# Supplementary material for: A benzothiazole-based new fluorogenic chemosensor for the detection of CN− and its real-time application in environmental water samples and living cells
Source: Royal Society of Chemistry journal article supplement (doi:10.1039/d1ra08846g), 2022-01-01
Supplement: d1ra08846g1.pdf [file d1ra08846g1.pdf]

## A benzothiazole-based new fluorogenic ratiometric chemosensor for CN<sup>-</sup> and its real time application in environmental water samples and living cells

Dhanapal Jothi<sup>a</sup>, Sathishkumar Munusamy<sup>b</sup>, Selin Manojkumar<sup>a</sup>, Saravanan Enbanathan<sup>a</sup> and Sathiyarayanan KulathuIyer<sup>a\*</sup>

<sup>a</sup>Department of Chemistry, School of Advanced Sciences and Vellore Institute of Technology, Vellore-632014, India. \*E-mail: [sathiya\\_kuna@hotmail.com](mailto:sathiya_kuna@hotmail.com)

<sup>b</sup>Institute of chemical biology and nanomedicine, State key laboratory of chemo/Bio-sensing and Chemometrics, College of Chemistry and Chemical Engineering, Hunan University, Changsha 410082, P.R.China. E-mail: [pra3sat@gmail.com](mailto:pra3sat@gmail.com)

### Table of contents

|                                                                                                                                                   |              |
|---------------------------------------------------------------------------------------------------------------------------------------------------|--------------|
| <b>Fig S1</b> <sup>1</sup> H NMR spectra of <b>BID</b>                                                                                            | <b>S3</b>    |
| <b>Fig S2</b> <sup>13</sup> C NMR spectra of <b>BID</b>                                                                                           | <b>S3</b>    |
| <b>Fig S3</b> HRMS spectra of <b>BID</b> and <b>BID +CN<sup>-</sup></b>                                                                           | <b>S4-S5</b> |
| <b>Fig S4</b> UV-vis absorption and photoluminescence properties of <b>BID</b> in toluene solvent; excitation wavelength is 408nm.                | <b>S5</b>    |
| <b>Fig S5</b> The Lippert-Mattaga plot for <b>BID</b> showing the Stokes shift versus orientation polarizability.                                 | <b>S6</b>    |
| <b>Fig S6</b> Linear plot of <b>BID + CN<sup>-</sup></b> . The calculated limit of detection of 5.97 nM.                                          | <b>S6</b>    |
| <b>Fig S7</b> The effect of salt ( <b>a, b</b> ) on the normalized fluorescence intensity of <b>BID</b> and <b>BID+CN<sup>-</sup></b> .           | <b>S7</b>    |
| <b>Fig S8</b> IR spectra of <b>BID</b> and <b>BID +CN<sup>-</sup></b>                                                                             | <b>S7</b>    |
| <b>Fig S9</b> The entire geometry optimizations structure of <b>BID</b> and <b>BID+CN<sup>-</sup></b> determined by DFT/B3LYP methods             | <b>S8</b>    |
| <b>Table S1</b> Oscillator strengths of important transitions for the <b>BID</b> and <b>BID + CN<sup>-</sup></b> determined by DFT/B3LYP methods. | <b>S8</b>    |

|                                                                                                                                                                         |                |
|-------------------------------------------------------------------------------------------------------------------------------------------------------------------------|----------------|
| <b>Fig S10</b> Quantitative calibration plot results for BID and incremental addition of CN <sup>-</sup> (2-10 μM) for BID-CN <sup>-</sup> samples in D <sub>2</sub> O. | <b>S9</b>      |
| <b>Table S2</b> Results of CN <sup>-</sup> readings in DMSO samples.                                                                                                    | <b>S9</b>      |
| <b>Fig S11</b> Cytotoxicity assay of sensor probe <b>BID</b>                                                                                                            | <b>S10</b>     |
| <b>Table S3</b> Comparison of LOD of CN <sup>-</sup> detection reported in recent papers.                                                                               | <b>S10-S11</b> |

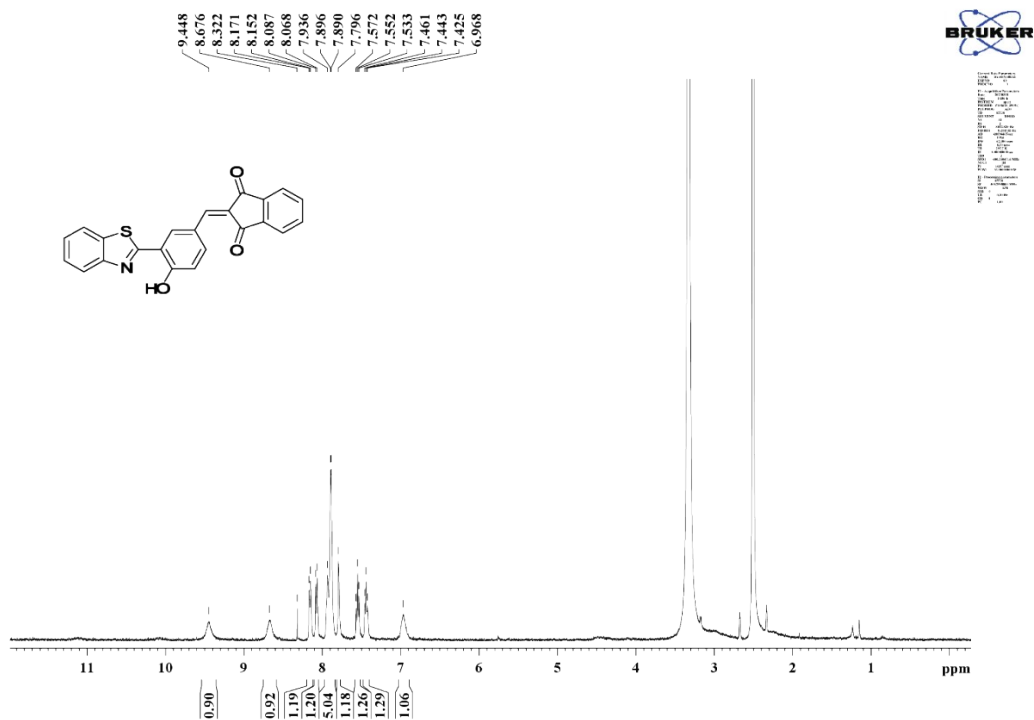

Fig S1 <sup>1</sup>H NMR spectra of BID.

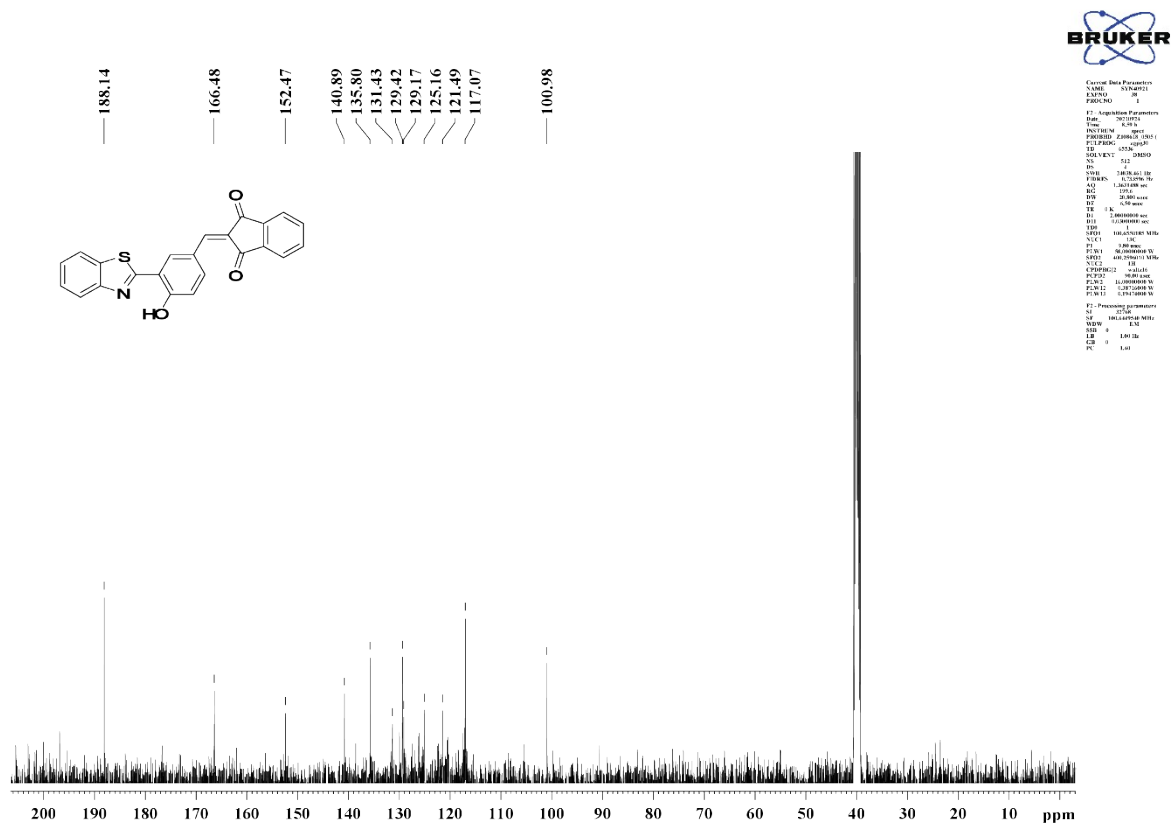

Fig S2 <sup>13</sup>C NMR spectra of BID.

|                    |                        |                               |         |                        |                                 |
|--------------------|------------------------|-------------------------------|---------|------------------------|---------------------------------|
| <b>Sample Name</b> | 060319-38-EXT-DK       | <b>Position</b>               | P2-D5   | <b>Instrument Name</b> | Instrument 1                    |
| <b>User Name</b>   |                        | <b>Inj Vol</b>                | 5       | <b>InjPosition</b>     |                                 |
| <b>Sample Type</b> | Sample                 | <b>IRM Calibration Status</b> | Success | <b>Data Filename</b>   | OPSDSABB.d                      |
| <b>ACQ Method</b>  | Direct Infusion_HPLC.m | <b>Comment</b>                |         | <b>Acquired Time</b>   | 06-03-2019 11:45:56 (UTC+05:30) |

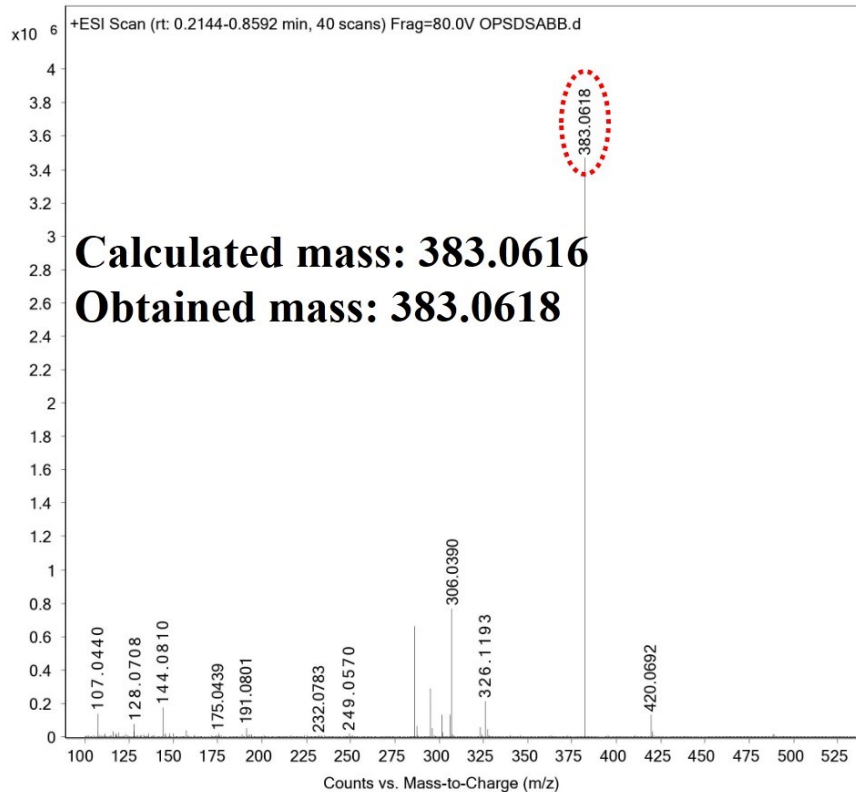

|                    |                        |                               |         |                        |                                 |
|--------------------|------------------------|-------------------------------|---------|------------------------|---------------------------------|
| <b>Sample Name</b> | 060319-38-EXT-DK-CN    | <b>Position</b>               | P2-D5   | <b>Instrument Name</b> | Instrument 1                    |
| <b>User Name</b>   |                        | <b>Inj Vol</b>                | 5       | <b>InjPosition</b>     |                                 |
| <b>Sample Type</b> | Sample                 | <b>IRM Calibration Status</b> | Success | <b>Data Filename</b>   | OPSDSABB.d                      |
| <b>ACQ Method</b>  | Direct Infusion_HPLC.m | <b>Comment</b>                |         | <b>Acquired Time</b>   | 06-03-2019 11:45:56 (UTC+05:30) |

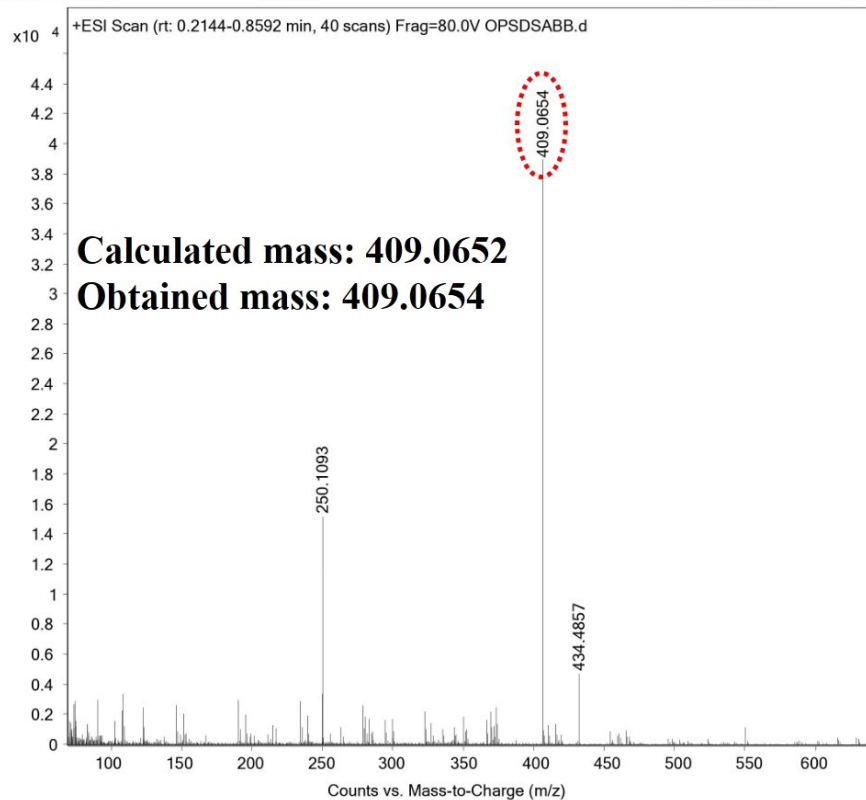

**Fig S3** HRMS spectra of **BID** and **BID +CN<sup>-</sup>**.

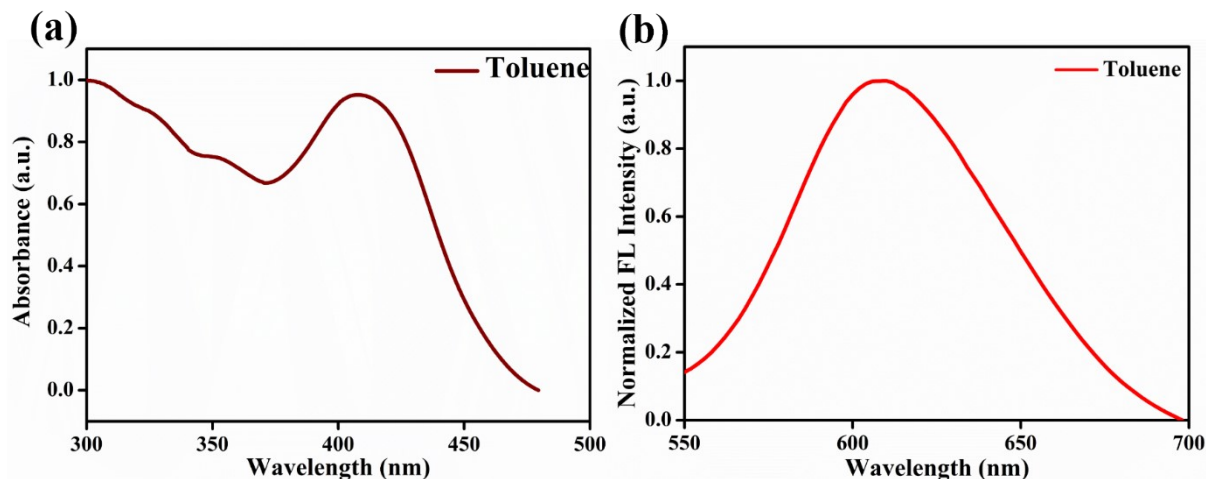

**Fig S4** UV-vis absorption and photoluminescence properties of **BID** in toluene solvent excitation wavelength is 408nm.

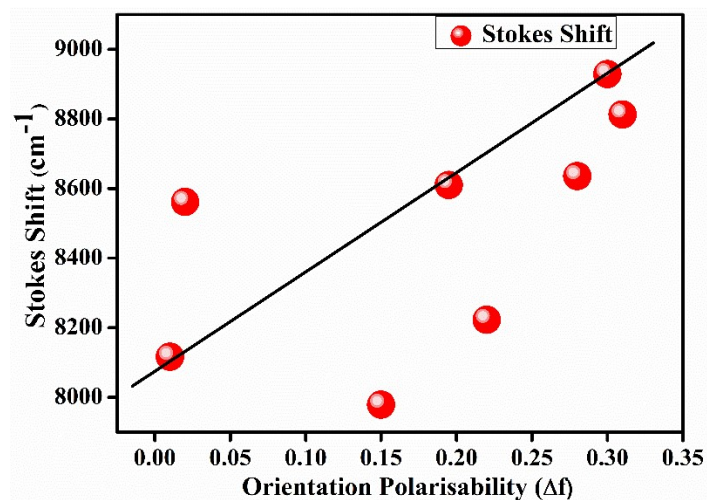

**Fig S5** The Lippert-Mattaga plot of **BID** showing the Stokes shift versus orientation polarizability.

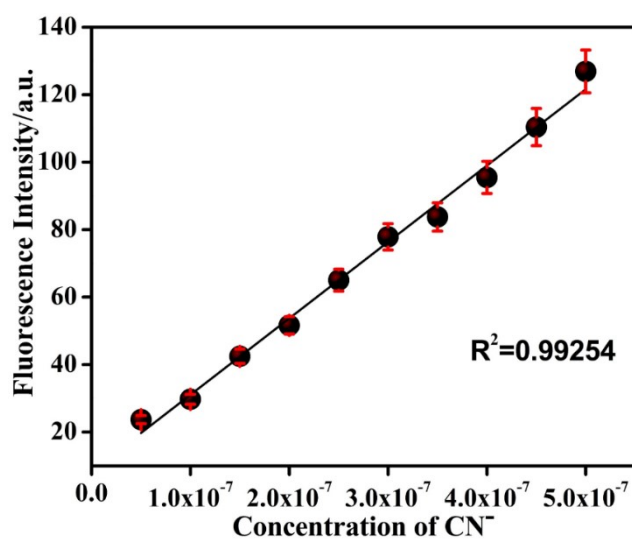

### LOD Calculation

Formula =  $3\sigma/\text{slope}$   
 Standard deviation=0.45  
 Slope= $2.26 \times 10^8$   
 LOD=  $5.97 \times 10^{-9}$  or 5.97nM

**Fig S6** Linear plot of **BID + CN<sup>-</sup>**. The calculated limit of detection of 5.97 nM.

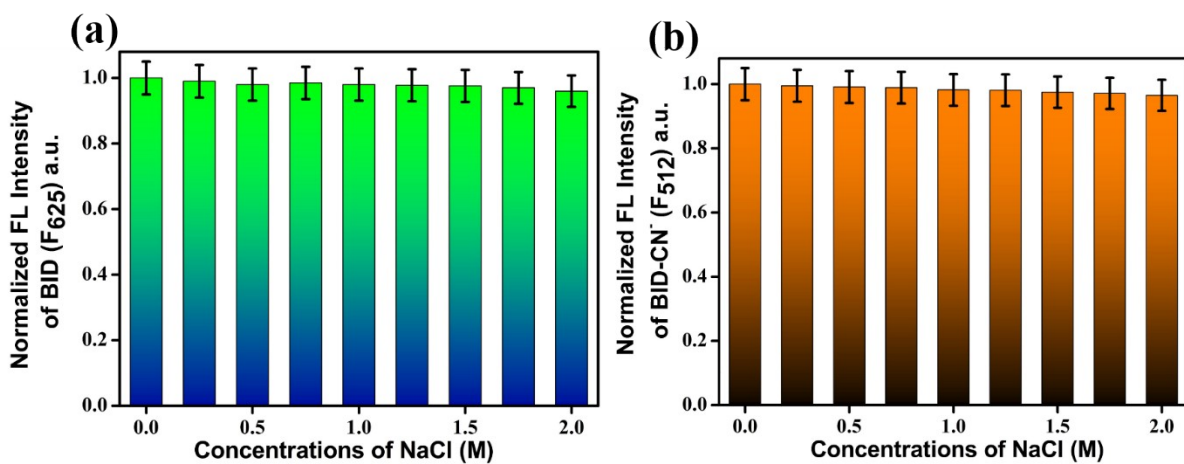

**Fig S7** The effect of salt (a, b) on the normalized fluorescence intensity of **BID** and **BID+CN<sup>-</sup>**.

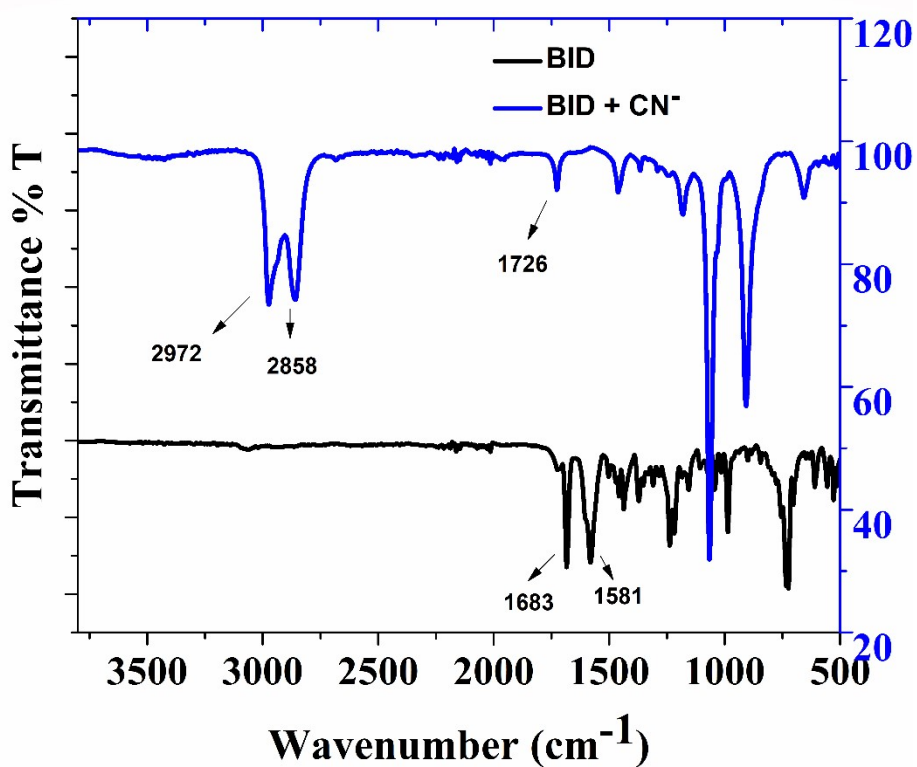

**Fig S8** IR spectra of **BID** and **BID+CN<sup>-</sup>**.

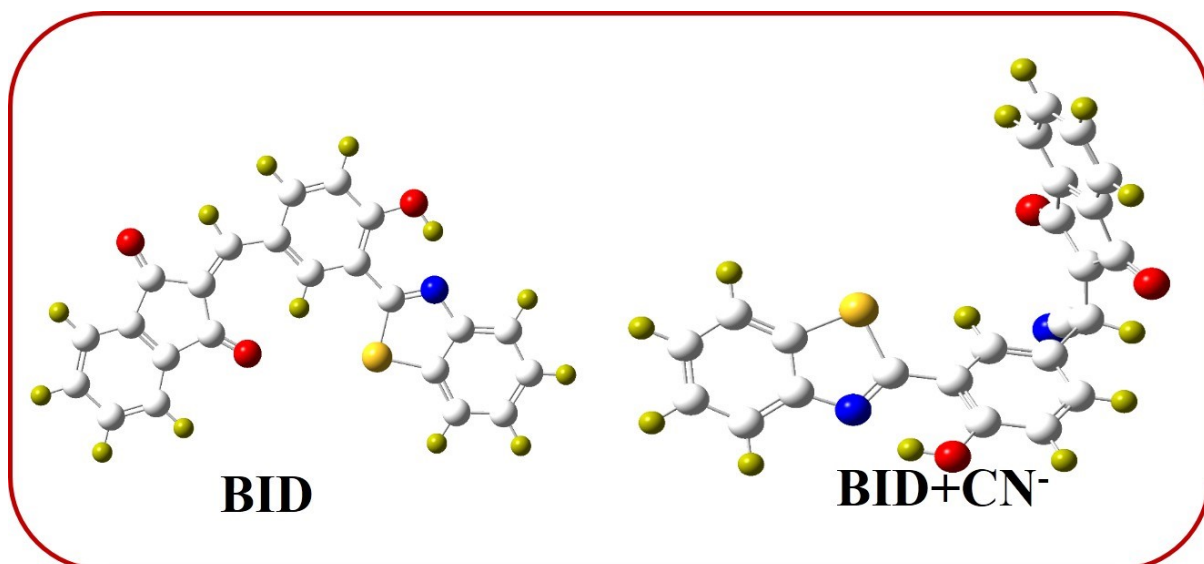

**Fig S9** The entire geometry optimizations structure of **BID** and **BID+CN<sup>-</sup>** determined by DFT/B3LYP methods.

**Table S1** Oscillator strengths of important transitions for the **BID** and **BID + CN<sup>-</sup>** determined by DFT/B3LYP methods.

| Entry                      | $\lambda$ max(nM) | Oscillatory strength | $\Delta E$ , Energy(eV) | Selected major transitions                          |
|----------------------------|-------------------|----------------------|-------------------------|-----------------------------------------------------|
|                            | 406.01            | 0.6990               | 18.5502                 | H $\rightarrow$ L (46%)                             |
| <b>BID</b>                 | 369.07            | 0.0152               | 18.2996                 | H $\rightarrow$ L <sub>1</sub> (45%)                |
|                            | 358.11            | 0.3577               | 18.2275                 | H <sub>1</sub> $\rightarrow$ L (44%)                |
|                            | 334.77            | 0.3059               | 18.1976                 | H $\rightarrow$ L <sub>2</sub> (44%)                |
|                            | 293.94            | 0.3140               | 17.3404                 | H <sub>2</sub> $\rightarrow$ L <sub>2</sub> (40%)   |
|                            | 265.85            | 0.1932               | 7.8540                  | H $\rightarrow$ L <sub>3</sub> 16%)                 |
|                            | 298.45            | 0.0034               | 15.8748                 | H <sub>4</sub> $\rightarrow$ L (34%)                |
| <b>BID+ CN<sup>-</sup></b> | 345.19            | 0.0015               | 6.7614                  | H <sub>3</sub> $\rightarrow$ L <sub>1</sub> (12.3%) |
|                            | 355.94            | 0.0005               | 3.5042                  | H $\rightarrow$ L (6.7%)                            |
|                            | 355.94            | 0.0005               | 8.2374                  | H <sub>2</sub> $\rightarrow$ L (18.2%)              |
|                            | 360.29            | 0.0001               | 4.6482                  | H <sub>1</sub> $\rightarrow$ L <sub>1</sub> (11.6%) |
|                            | 599.36            | 0.0076               | 2.7380                  | H <sub>4</sub> $\rightarrow$ L (4.1%)               |
|                            | 421.60            | 0.0005               | 2.9510                  | H <sub>1</sub> $\rightarrow$ L <sub>4</sub> (4.7%)  |
|                            | 415.73            | 0.0026               | 3.0509                  | H <sub>5</sub> $\rightarrow$ L <sub>2</sub> (5.0%)  |



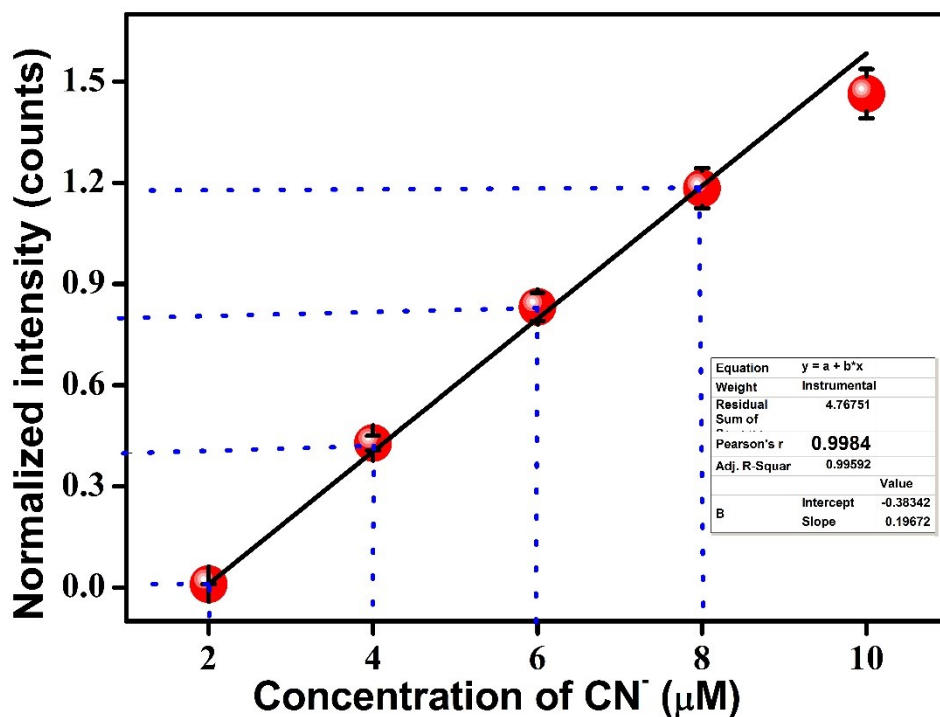

**Fig S10** Quantitative calibration plot results for BID and incremental addition of CN<sup>-</sup> (2-10 μM) for BID-CN<sup>-</sup> samples in DMSO.

**Table S2** Results of CN<sup>-</sup> readings in DMSO samples.

| Sample | Spiked (μM) | Found ( $X^a \pm SD^b$ ) (μM) | Recovery (%) | RSD <sup>c</sup> (%) |
|--------|-------------|-------------------------------|--------------|----------------------|
| DMSO   | 2           | 1.979 ± 0.007                 | 99.3         | 0.17                 |
|        | 4           | 3.988 ± 0.006                 | 99.6         | 0.19                 |
|        | 6           | 6.013 ± 0.004                 | 98.4         | 0.29                 |

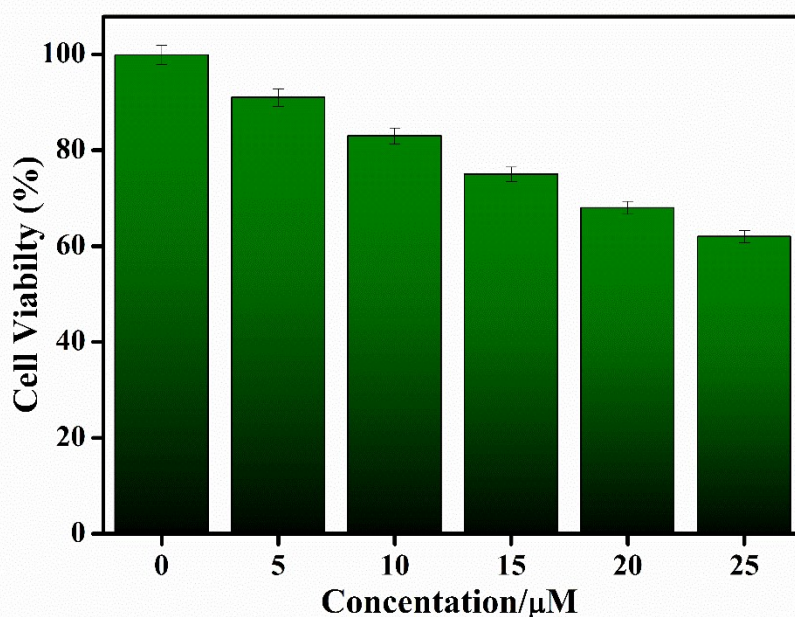

**Fig S11** Cytotoxicity assay of sensor probe **BID**.

**Table S3**

Comparison of LOD of CN<sup>-</sup> detection reported in recent papers.

| S.No | Reported Probe                                                                                                  | LOD     | Reference                                     |
|------|-----------------------------------------------------------------------------------------------------------------|---------|-----------------------------------------------|
| 1    | Naphthalimide based probes                                                                                      | 1.7 μM  | RSC Adv. 6 (2016) 33031-33035                 |
| 2    | Naphthylamide dye                                                                                               | 7.7 μM  | Scientific reports. 10 (2017) 41598-13325     |
| 3    | Diethylaminosalicylaldehyde-Substituted based                                                                   | 3.39 μM | Dyes and Pigments. 174 (2019) 108049          |
| 4    | Coumarin based sensor probe                                                                                     | 2.07 μM | NJC. 43 (2019) 16796-16800.                   |
| 5    | (4-(2-(4-(diethylamino)phenyl)-4-methyl-5-oxo-4,5-dihydrothieno pyridin-7-yl)phenyl 2,4-dinitrobenzenesulfonate | 3.2 μM  | ACS OMEGA. 5 (2020) 32507–32514               |
| 6    | Peptoid based                                                                                                   | 6.28 μM | ACS Applied Bio Materials. 3 (2020) 6039-6048 |
| 7    | Naphthalene based sensor probe                                                                                  | 1.1 μM  | Chemcomm. 50 (2014) 12234                     |
| 8    | quinoline-indolium-based sensor probe                                                                           | 3.5 μM  | NJC. 42 (2018) 5367–5375                      |
| 9    | Aminomalenonitrile based sensor probes                                                                          | 7.49 nM | Org. Biomol. Chem., 12 (2014) 479             |
| 10   | Copper (II) complex of azo-dye                                                                                  | 2.5 μM  | Spectrochimica Acta part A 10 (2017) 1016     |

|           |                              |                    |                                                                                       |
|-----------|------------------------------|--------------------|---------------------------------------------------------------------------------------|
| 11        | Diketodiphenylpyrrolopyrrole | 171 $\mu\text{M}$  | Sensors Actuators B Chem. 245 (2017) 845–852                                          |
| 12        | Indanedione based            | 9.4 $\mu\text{M}$  | Sensors and Actuators B 233 (2016) 510–519                                            |
| 13        | Phenylquinazolinone-based    | 40 $\mu\text{M}$   | RSC Adv. 10 (2020) 44860–44875                                                        |
| 14        | Naphthopyran based           | 7.56 $\mu\text{M}$ | Spectrochimica Acta Part A: Molecular and Biomolecular Spectroscopy 217 (2019) 27–34  |
| 15        | Disulfide Schiff base        | 250 $\mu\text{M}$  | New J. Chem. 43 (2019) 13536–13544                                                    |
| 16        | Imidazole based              | 5.3 $\mu\text{M}$  | Spectrochimica Acta Part A: Molecular and Biomolecular Spectroscopy 234 (2020) 118212 |
| 17        | Azo salicylaldehyde based    | 1.95 $\mu\text{M}$ | Inorganic Chemistry Communications 102 (2019) 83–89                                   |
| 18        | 1.3-indanedione based        | 1.7 $\mu\text{M}$  | ACS Omega 2021, 6, 5287–5296                                                          |
| <b>19</b> | <b>benzothiazole-based</b>   | <b>5.97nM</b>      | <b>This work</b>                                                                      |
